# Supplementary material for: CRISPR/Cas9-Mediated Deletion of CTG Expansions Recovers Normal Phenotype in Myogenic Cells Derived from Myotonic Dystrophy 1 Patients
Source: PubMed Central journal article supplement — Mol Ther Nucleic Acids. 2017 Oct 14;9:337–48. doi: 10.1016/j.omtn.2017.10.006 (PMC5684470; doi:10.1016/j.omtn.2017.10.006), 2017-10-14
Supplement: mmc1.pdf [file mmc1.pdf]

**OMTN, Volume 9**

**Supplemental Information**

**CRISPR/Cas9-Mediated Deletion of CTG Expansions**

**Recovers Normal Phenotype in Myogenic Cells**

**Derived from Myotonic Dystrophy 1 Patients**

**Claudia Provenzano, Marisa Cappella, Rea Valaperta, Rosanna Cardani, Giovanni Meola, Fabio Martelli, Beatrice Cardinali, and Germana Falcone**

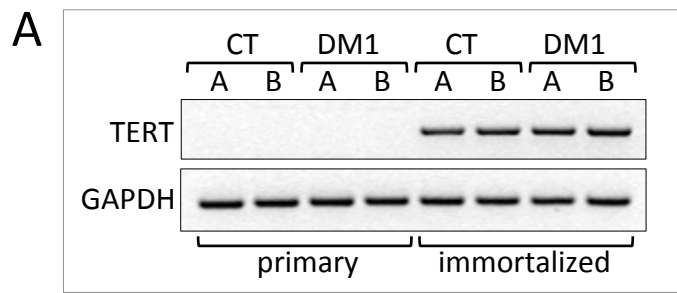

**B**

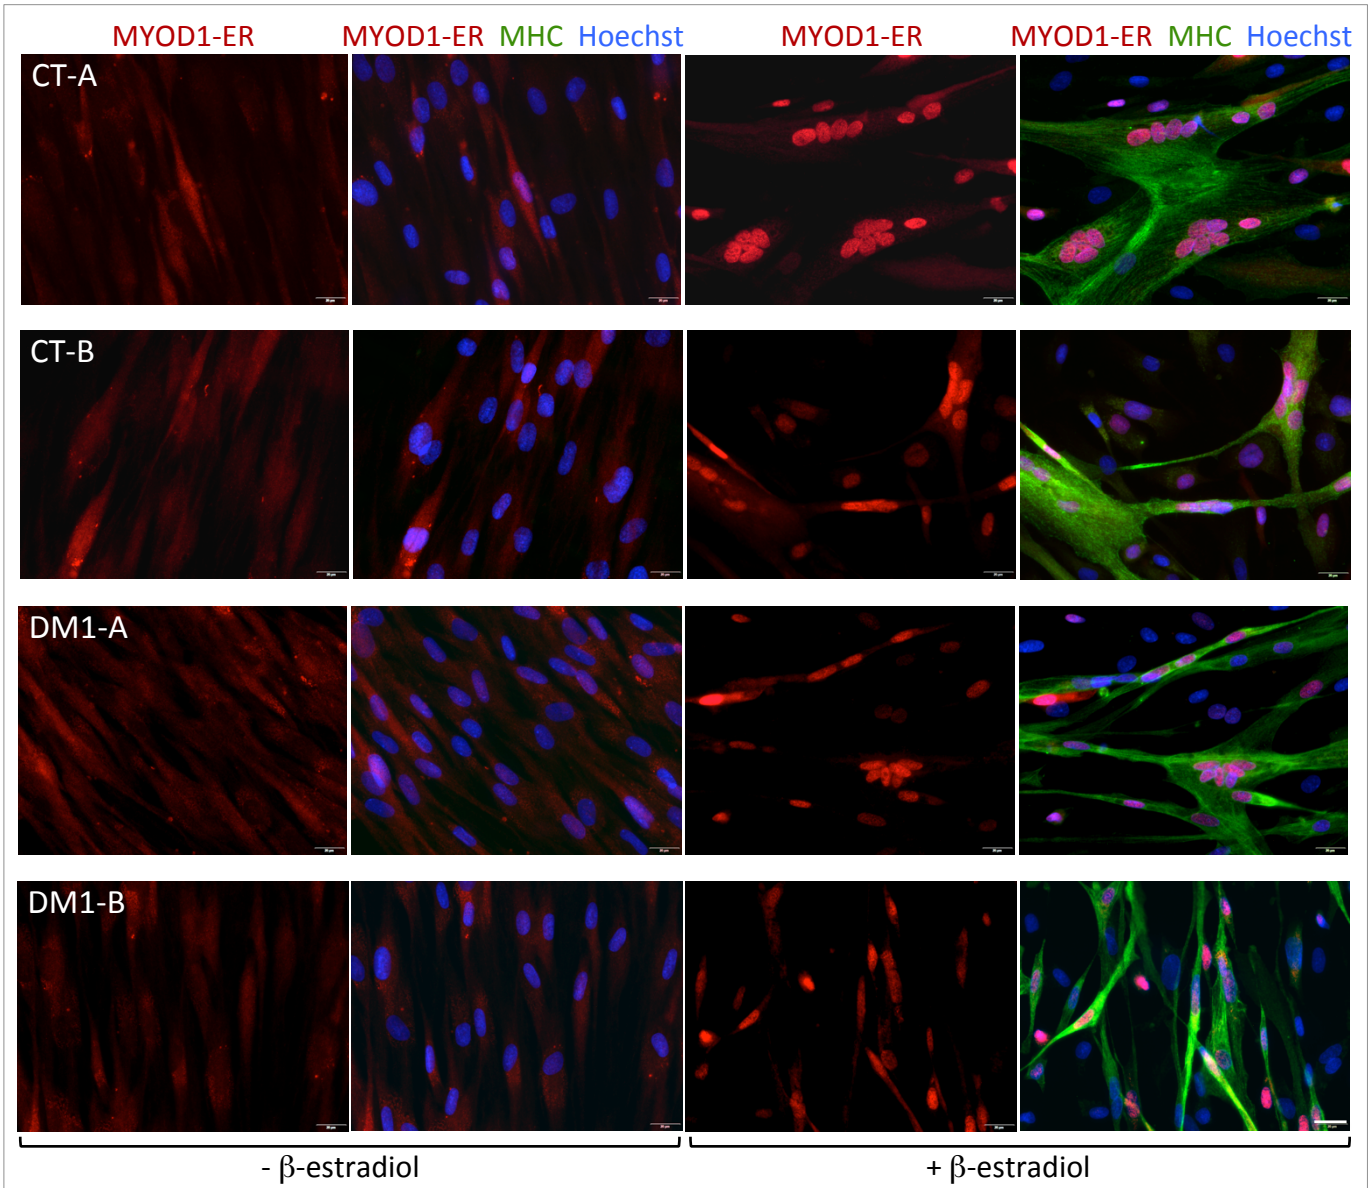

**Figure S1. Immortalization and MYOD1-dependent differentiation of human DM1 and Control fibroblasts.** (A) Semiquantitative RT-PCR analysis of *TERT* (*TERT*) and *GAPDH* (*GAPDH*) transcripts in primary fibroblasts derived from control (CT, A and B) and DM1 (DM1, A and B) patients before (primary) and after transduction with *TERT*-expressing retrovirus (immortalized). (B) Immunofluorescence analysis of control (CT-A and CT-B) and DM1 patient-derived cell lines (DM1-A and DM1-B) allowed to differentiate for 5 days and stained with antibodies anti-mouse MYOD1 and anti-myosin (MHC), and Hoechst dye (scale bar 20  $\mu$ m). Staining of MYOD1-ER alone or merged with MHC is shown in the absence and in the presence of  $\beta$ -estradiol. Note change of MYOD1-ER from cytoplasmic to nuclear localization upon hormone induction.

**A**

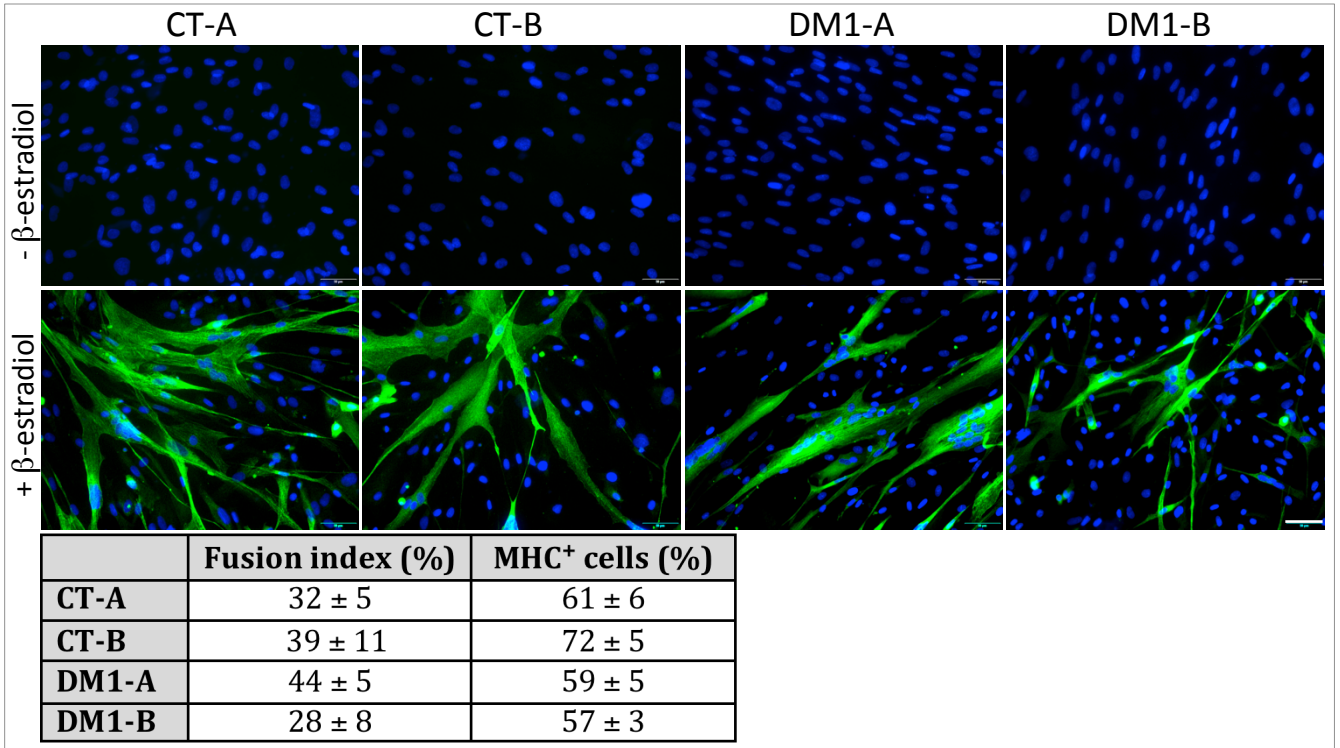

**B**

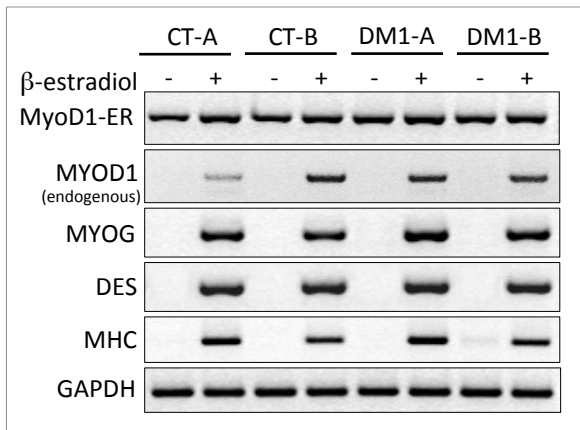

**C**

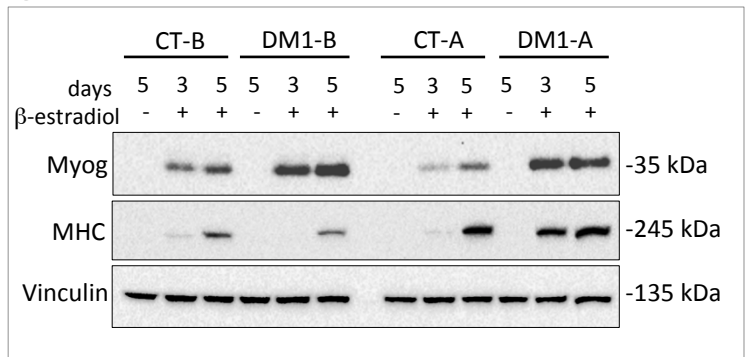

**Figure S2. Differentiation of immortalized human DM1 and Control myogenic cells.** Immortalized myogenic cells derived from DM1 patients and control individuals were cultured in differentiation medium with or without  $\beta$ -estradiol addition. (A) Immunofluorescence analysis of control (CT-A and CT-B) and DM1 patient-derived cell lines (DM1-A and DM1-B) allowed to differentiate for 5 days and stained with anti-MHC antibody and Hoechst dye (scale bar 50  $\mu$ m). The fusion index and the percentage of MHC positive cells is shown in the table below (average  $\pm$  standard error, n  $\geq$  3). The fusion index is calculated as the percentage of nuclei in MHC positive myotubes (containing  $\geq$  2 nuclei) over the total number of cells. At least 300 cell nuclei were counted for each experiment. (B) Semi-quantitative RT-PCR analysis of *MyoD1-ER* (MyoD1-ER) and muscle specific endogenous *MYOD1* (MYOD1), *MYOG* (MYOG), *DES* (DES) and *MYHC* (MHC) mRNAs in control and DM1 cell lines following induction to differentiation for 5 days. *GAPDH* transcript (GAPDH) was analyzed as control. (C) Western blot analysis of the muscle specific proteins myogenin (Myog) and myosin (MHC), and constitutively expressed vinculin (Vinculin) in control and DM1 cell lines without or with  $\beta$ -estradiol addition for 3 and 5 days.

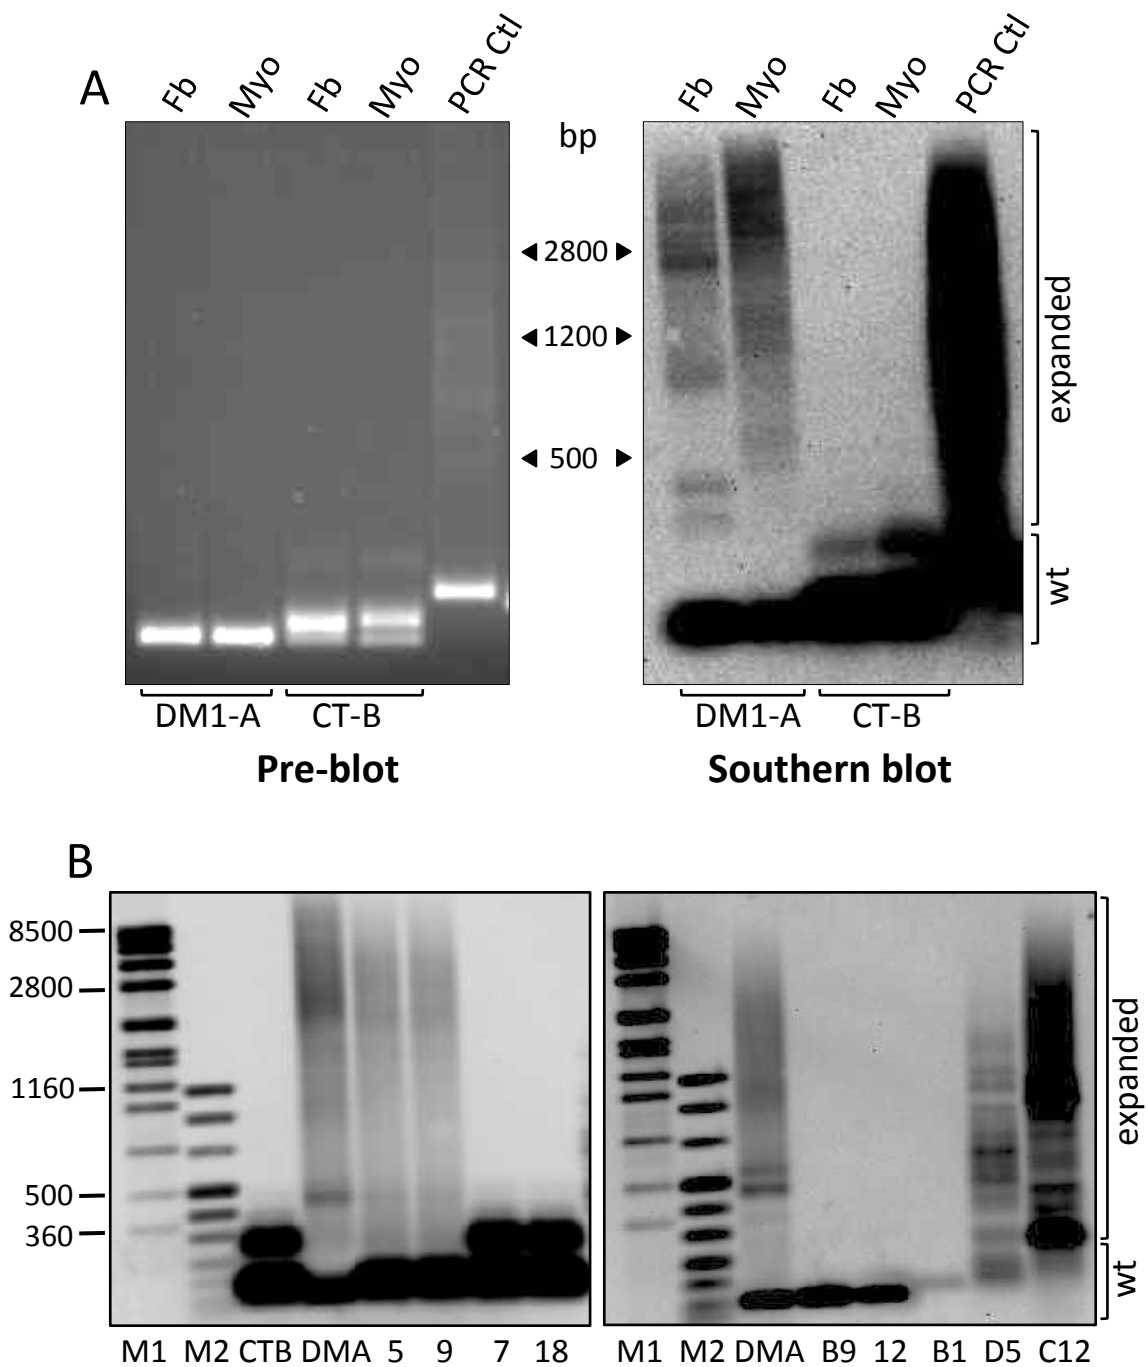

**Figure S3. Analysis of CTG repeats in DM1-A and CT-B cells and in CRISPR/Cas9-edited clones.** (A) Genomic DNAs from DM1-A and CT-B primary fibroblasts (Fb) and immortalized myogenic cells (Myo) were analyzed by long-PCR of CTG expansions followed by Southern blot with a 5'DIG-labeled (CTG)<sub>10</sub> probe. PCR positive controls were loaded on the gel (PCR Ctl). Note that only bands corresponding to amplification of the wt alleles are visible on the gel before blotting (pre-blot). (B) Genomic DNAs from CT-B and DM1-A cells and CRISPR/Cas9-treated clones (5, 9, 7, 18, B9, 12, B1, D5 and C12) were analyzed as described in A. Bands corresponding to wt alleles and to alleles with expansions of multiple sizes can be visualized. Molecular weight markers are indicated: 500 bp correspond to about 120 triplets, 1200 to about 340 triplets and 2800 to about 890 triplets.

**A**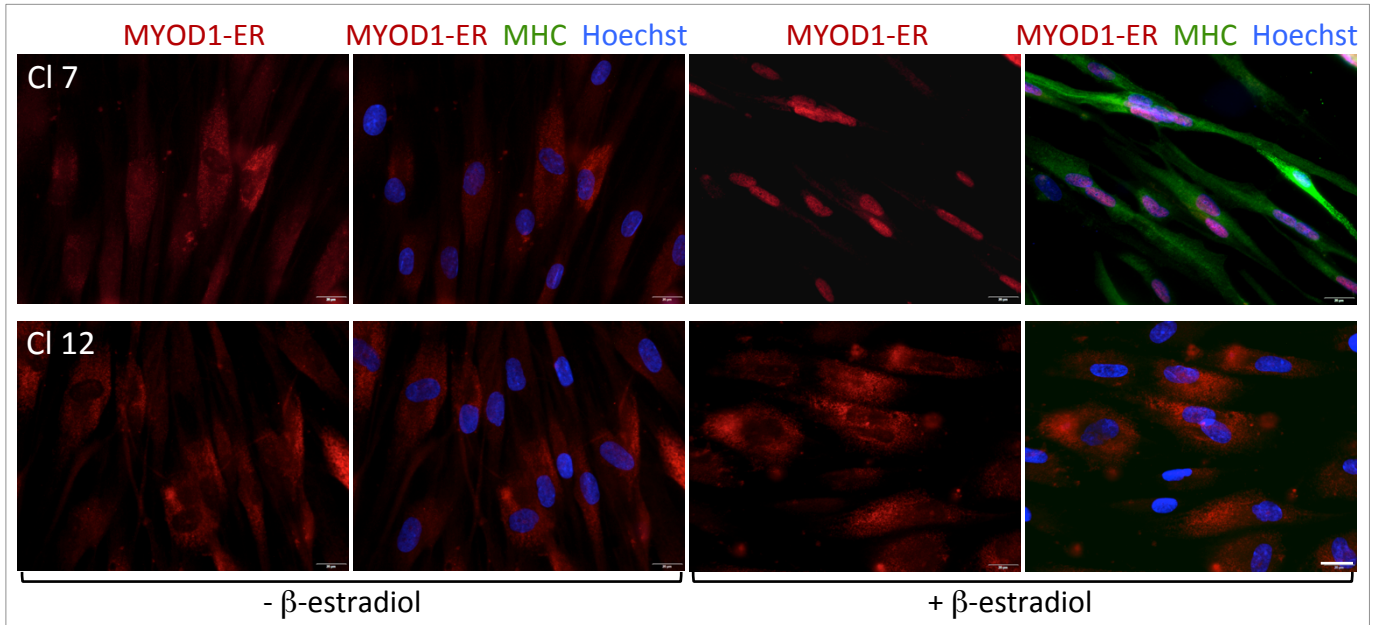**B**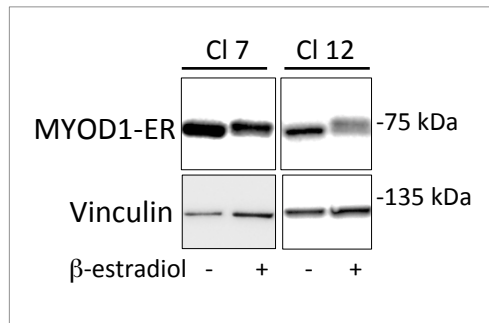

**Figure S4. Defective MYOD1-ER nuclear translocation impairs differentiation of CRISPR/Cas9-edited clone 12.** (A) Immunofluorescence analysis of CRISPR/Cas9-edited clone 7 and clone 12 allowed to differentiate for 5 days and stained with antibodies to mouse MYOD1 and to myosin (MHC), and Hoechst dye (scale bar 20  $\mu$ m). Staining of MYOD1-ER alone or merged with MHC is shown in the absence and in the presence of  $\beta$ -estradiol. Note that translocation of MYOD1-ER from cytoplasm to nucleus does not occur in clone 12 upon hormone induction. (B) Western blot analysis of MYOD1-ER and constitutively expressed vinculin (Vinculin) in clone 7 and clone 12 without or with  $\beta$ -estradiol addition for 5 days.

**Table S1. Potential genomic off-target sites for sgRNAs 34 and 589**

| GUIDE | TARGET           | SEQUENCE                            | PAM | SCORE    | CHR       | Strand | GENE         |
|-------|------------------|-------------------------------------|-----|----------|-----------|--------|--------------|
| sg34  | <b>ON-Target</b> | GGGCACTCAGTCTTCCAACG                | GGG | <b>0</b> | <b>19</b> | +      | <b>DMPK</b>  |
|       | sg34_OT1         | GGGC <sup>^</sup> CTGTGTCTTCCAACG   | GGG | 1.32     | 2         | +      | -            |
|       | sg34_OT2         | TGGGACTCAGT <sup>^</sup> TTCCAACG   | TGG | 1.6      | 2         | +      | TNS1         |
|       | sg34_OT3         | GGGCATTCAGACTT <sup>^</sup> CAACG   | AGG | 3.32     | 2         | -      | None         |
|       | sg34_OT4         | GGACACTCAGTCTTCC <sup>^</sup> ACG   | GGG | 3.66     | 14        | +      | LOC105370681 |
|       | sg34_OT5         | GGACACTCAGGCTTCC <sup>^</sup> ACG   | TGG | 4.36     | 16        | -      | LOC105371392 |
|       | sg34_OT6         | AGGCATTCAGTCTTCCAA <sup>^</sup> G   | TGG | 5.84     | 1         | +      | SLC44A3-AS1  |
|       | sg34_OT7         | GGGCGCTCAG <sup>^</sup> CTTCCAAGG   | TGG | 6.4      | 5         | +      | ZDHHC11      |
| sg589 | <b>ON-Target</b> | AAATATCCAAACCGCCGAAG                | CGG | <b>0</b> | <b>19</b> | +      | <b>DMPK</b>  |
|       | sg589_OT1        | GAATATCAAACCA <sup>^</sup> CCGAAG   | GGG | 1.69     | 20        | +      | None         |
|       | sg589_OT2        | AAAT <sup>^</sup> TCCAAACAGCCGAAG   | TGG | 1.8      | 2         | -      | CNTNAP5      |
|       | sg589_OT3        | AAATAACCAAACC <sup>^</sup> CAGAAG   | AGG | 4.32     | 3         | -      | TF           |
|       | sg589_OT4        | AAATATCCATACTGCCCAAG                | GGG | 4.6      | 1         | +      | None         |
|       | sg589_OT5        | AAATATCCAAACCTCC <sup>^</sup> AAG   | GGG | 4.81     | 16        | +      | CDH8         |
|       | sg589_OT6        | AAGTATCCAAACCCCGATG                 | TGG | 6.45     | 1         | -      | IFI16        |
|       | sg589_OT7        | AAATATCCAAACTGCC <sup>^</sup> AGCAG | TGG | 8.8      | 5         | -      | LINC00992    |

**Table S2. List of primers used for PCR and cloning**

| <b>RT- PCR Primers</b>                            |                                                                                                                                         |                                                                                                                                           |
|---------------------------------------------------|-----------------------------------------------------------------------------------------------------------------------------------------|-------------------------------------------------------------------------------------------------------------------------------------------|
| <b>Name</b>                                       | <b>Forward (F)</b>                                                                                                                      | <b>Reverse (R)</b>                                                                                                                        |
| hGAPDH                                            | AAACCTTCCTCAGCTATGCC                                                                                                                    | TGACGCGCAGGAAAAATGTG                                                                                                                      |
| hMYOD1                                            | AGCACTACAGCGGCGACTCC                                                                                                                    | GCGACTCAGAAGGCACGTCC                                                                                                                      |
| hMYOG                                             | CCCTGAAGAGAAGCACCTG                                                                                                                     | CAGATGATCCCCTGGGTTGG                                                                                                                      |
| hDESM                                             | GAGGACCGATTTGCCAGTGA                                                                                                                    | GATGGGGAGATTGATCCGGC                                                                                                                      |
| hMYH1                                             | TCCAAAGCCAAGGGAAACCT                                                                                                                    | CCCCTCGAGAGCTGTGAAAC                                                                                                                      |
| mMyoD                                             | CCGTGTTTCGACTCACCAGA                                                                                                                    | CATTCACTTTGCTCAGGCGG                                                                                                                      |
| hINSR ex11                                        | CCAAAGACAGACTCTCAGAT                                                                                                                    | AACATCGCCAAGGGACCTGC                                                                                                                      |
| hSERCA1 ex22                                      | ATCTTCAAGCTCCGGGCCCT                                                                                                                    | CAGCTCTGCCTGAAGATGTG                                                                                                                      |
| <b>Off targets PCR Primers</b>                    |                                                                                                                                         |                                                                                                                                           |
| <b>Name</b>                                       | <b>Forward (F)</b>                                                                                                                      | <b>Reverse (R)</b>                                                                                                                        |
| sg34_OT1                                          | TCATAGCTTGAATCATACCATCCAG                                                                                                               | TCTGAGACGCACTTTTAACGC                                                                                                                     |
| sg34_OT2                                          | TTGTGGTGGTCCCAAGCAAT                                                                                                                    | CCTGGGGAGGTCTAAGGACA                                                                                                                      |
| sg34_OT3                                          | ATTCTGGACAACGTCCACCC                                                                                                                    | GGATTCAAGCCTCTGGGGAC                                                                                                                      |
| sg34_OT4                                          | ACAGATGCCAGGATGTGTGG                                                                                                                    | GCGTGGCACATAGCAACTTC                                                                                                                      |
| sg34_OT5                                          | TCTGTCCCAGGGATGGATT                                                                                                                     | CTCTCCCTCACACCTCTCA                                                                                                                       |
| sg34_OT6                                          | AGTTCCTCCCTTGTGCTCT                                                                                                                     | AGAGCAGCCAGAGATCCTCA                                                                                                                      |
| sg34_OT7                                          | CTCAAACACACCTGCACACC                                                                                                                    | TGAAGGTGCATGTATGGGGG                                                                                                                      |
| sg589_OT1                                         | CCCCTCCAGTCTCCTCAACT                                                                                                                    | GGGGAAATGGAGACCAGGTG                                                                                                                      |
| sg589_OT2                                         | AGATCCCAACACTTTGACACA                                                                                                                   | TCCAACATGAAAACGGAGA                                                                                                                       |
| sg589_OT3                                         | ACAAAGCAAGCAGTAGGTTAGC                                                                                                                  | CAAACGAGAGCTTTGCCATTG                                                                                                                     |
| sg589_OT4                                         | AGCCTACGATGAGATCACTGA                                                                                                                   | ATGTGTGGATTTATGTCTGGGT                                                                                                                    |
| sg589_OT5                                         | AATAAGTGTATGCAGCCCATGC                                                                                                                  | TCAGAGCAGAAGTTCCTGGAAAG                                                                                                                   |
| sg589_OT6                                         | TTCCTGAATAATAAATCCCCAGT                                                                                                                 | ACTTCCCACCCCTGTGTTG                                                                                                                       |
| sg589_OT7                                         | ACCACGTTCTTACAGATCAAACA                                                                                                                 | GGGGAAAGTGTCTGTGGTA                                                                                                                       |
| <b>DMPK PCR Primers</b>                           |                                                                                                                                         |                                                                                                                                           |
| <b>Name</b>                                       | <b>Forward (F)</b>                                                                                                                      | <b>Reverse (R)</b>                                                                                                                        |
| up                                                | TGTTCCGCCGTTGTTCTGTCTC                                                                                                                  | GCATTCCCGCTACAAGGAC                                                                                                                       |
| dw                                                | GGATCACAGACCATTCTTTCTTTC                                                                                                                | CAGAGCTTTGGGCAGATGGAG                                                                                                                     |
| in                                                | AACGGGGCTCGAAGGGTCTTGTAGC                                                                                                               | CTCCCAGGCCTGCAGTTGCCATC                                                                                                                   |
| <b>DNA oligonucleotides for cloning of sgRNAs</b> |                                                                                                                                         |                                                                                                                                           |
| <b>Name</b>                                       | <b>Forward (F)</b>                                                                                                                      | <b>Reverse (R)</b>                                                                                                                        |
| sgRNA 34                                          | Phosphate_GGGCACTCAGTCTTCCAACGGTTTC<br>AGAGCTATGCTGGAAACAGCATAGCAAGTTG<br>AAATAAGGCTAGTCCGTTATCAACTTGAAAAA<br>GTGGCACCGAGTCGGTGCTTTTTTC | Phosphate_TCGAGAAAAAGCACCGACTCGGTGCCAC<br>TTTTTCAAGTTGATAACGGACTAGCCTTATTCAAC<br>TTGCTATGCTGTTTCCAGCATAGCTCTGAAACCGTT<br>GGAAGACTGAGTGCC  |
| sgRNA 101                                         | Phosphate_GCGGAGACCCACGCTCGGAGGTTTC<br>AGAGCTATGCTGGAAACAGCATAGCAAGTTG<br>AAATAAGGCTAGTCCGTTATCAACTTGAAAAA<br>GTGGCACCGAGTCGGTGCTTTTTTC | Phosphate_TCGAGAAAAAGCACCGACTCGGTGCCAC<br>TTTTTCAAGTTGATAACGGACTAGCCTTATTCAAC<br>TTGCTATGCTGTTTCCAGCATAGCTCTGAAACCTCC<br>GAGCGTGGGTCTCCGC |
| sgRNA 384                                         | Phosphate_GGTGCGTGGAGGATGGAACAGTTTC<br>AGAGCTATGCTGGAAACAGCATAGCAAGTTG<br>AAATAAGGCTAGTCCGTTATCAACTTGAAAAA<br>GTGGCACCGAGTCGGTGCTTTTTTC | Phosphate_TCGAGAAAAAGCACCGACTCGGTGCCAC<br>TTTTTCAAGTTGATAACGGACTAGCCTTATTCAAC<br>TTGCTATGCTGTTTCCAGCATAGCTCTGAAACTGTT<br>CCATCTCCACGCACC  |
| sgRNA 589                                         | Phosphate_AAATATCCAAACCGCCGAAGGTTTC<br>AGAGCTATGCTGGAAACAGCATAGCAAGTTG<br>AAATAAGGCTAGTCCGTTATCAACTTGAAAAA<br>GTGGCACCGAGTCGGTGCTTTTTTC | Phosphate_TCGAGAAAAAGCACCGACTCGGTGCCAC<br>TTTTTCAAGTTGATAACGGACTAGCCTTATTCAAC<br>TTGCTATGCTGTTTCCAGCATAGCTCTGAAACCTTC<br>GCGGTTTGATATT    |
